1  
2  
3  
4  
5  
6  
7  
8  
9  
10  
11  
12  
13  
14  
15  
16  
17  
18  
19  
20  
21  
22  
23  
24  
25

**Molecular basis of functional compatibility between ezrin and other actin-membrane  
associated proteins during cytokinesis**

Guang Yang<sup>1</sup>, Shota Hiruma<sup>1</sup>, Akira Kitamura<sup>1,2</sup>, Masataka Kinjo<sup>1,2</sup>, Mithilesh Mishra<sup>3</sup>, and Ryota  
Uehara<sup>1,2</sup>

<sup>1</sup>Graduate School of Life Science, Hokkaido University, Japan

<sup>2</sup>Faculty of Advanced Life Science, Hokkaido University, Japan

<sup>3</sup>Department of Biological Sciences, Tata Institute of Fundamental Research, India

Corresponding author:

Ryota Uehara, Faculty of Advanced Life Science, Hokkaido University, Kita 21, Nishi 11, Kita-ku,  
Sapporo 001-0021, Japan

E-mail: [ruehara@sci.hokudai.ac.jp](mailto:ruehara@sci.hokudai.ac.jp)

Phone: 81-11-706-9238

26 **Abstract**

27 The mechanism that mediates the interaction between the contractile ring and the plasma membrane  
28 during cytokinesis remains elusive. We previously found that ERM (Ezrin/Radixin/Moesin) proteins,  
29 which usually mediate cellular pole contraction, become over-accumulated at the cell equator and  
30 support furrow ingression upon the loss of other actin-membrane associated proteins, anillin and  
31 supervillin. In this study, we addressed the molecular basis of the semi-compatibility between ezrin  
32 and other actin-membrane associated proteins in mediating cortical contraction during cytokinesis.  
33 We found that depletion of supervillin and anillin caused over-accumulation of the membrane-  
34 associated FERM domain and actin-binding C-terminal domain (C-term) of ezrin at the cleavage  
35 furrow, respectively. This finding suggests that ezrin differentially shares its binding sites with these  
36 proteins on the actin cytoskeleton or inner membrane surface. Using chimeric mutants, we found  
37 that ezrin C-term, but not the FERM domain, can substitute for the corresponding anillin domains in  
38 cytokinesis and cell proliferation. On the other hand, either the membrane-associated or the  
39 actin/myosin-binding domains of anillin could not substitute for the corresponding ezrin domains in  
40 controlling cortical blebbing at the cell poles. Our results highlight specific designs of actin- or  
41 membrane-associated moieties of different actin-membrane associated proteins with limited  
42 compatibility, which enables them to support diverse cortical activities on the shared actin-  
43 membrane interface during cytokinesis.

44

45

## 46 **Introduction**

47

48 Contractile force generated by the actin cytoskeleton-based contractile ring drives cell membrane  
49 deformation in cytokinesis. In this process, different types of proteins containing both actin- and  
50 membrane-associated domains concentrate at the cleavage furrow that forms at the cell equator.  
51 Anillin consists of the N-terminal actin/myosin-binding domains and the C-terminal  
52 phosphatidylinositol 4,5-bisphosphate (PIP<sub>2</sub>)-binding domain, through which it anchors the  
53 contractile ring to the cell equator for membrane deformation in different animal cells [1-3].  
54 Supervillin also possesses actin- and myosin-binding domains, associates with the plasma  
55 membrane, and mediates cleavage furrow ingression in mammalian cells [4-6]. ERM proteins  
56 associate with the membrane through their conserved N-terminal FERM domain, bind to F-actin  
57 through the C-terminal domain, and accumulate prominently at the cleavage furrow [7-10].  
58 Depletion of anillin and supervillin causes severe and modest furrowing defects, respectively,  
59 during cytokinesis [6, 11-13]. On the other hand, depletion of ERM proteins does not affect  
60 cytokinesis progression either in human or *Drosophila* cells [10, 14, 15]. ERM depletion instead  
61 affects the cell polar cortex's reorganization during cytokinesis, particularly perturbing membrane  
62 retraction during cortical blebbing [14-16]. Moreover, deregulation of moesin's phosphorylation  
63 cycles impairs cortical dynamics at the cell poles, blocks normal cell elongation during anaphase,  
64 and causes cytokinesis defects [17, 18]. However, it remains mostly elusive why these actin-  
65 membrane associated proteins are different in their functions and relative contributions to  
66 cytokinesis control, despite the apparent similarity in their molecular design.

67

68 A possible reason for the difference in these actin-membrane associated proteins' functionality may  
69 be the distinctive characteristics of their molecular domains. For example, a myosin-binding domain  
70 is closely located beside the actin-binding domain in anillin and supervillin but is absent in ERM  
71 proteins, which may limit the interaction of ERM proteins with the contractile ring [2, 5]. Moreover,  
72 anillin's actin-binding domain contains characteristic multiple actin-binding sites, enabling F-actin

73 bundling with the distinctive polymorphic modes [19, 20]. Such distinctive properties of molecular  
74 domains may promote specialization of their roles in reorganizing the actin-membrane interface at  
75 the cleavage furrow. Moreover, differences in their interactomes would also enable the diverse  
76 functions of these proteins. For example, anillin interacts with an essential cytokinesis regulator  
77 RhoA through its C-terminal Rho-binding domain, facilitating the importin-mediated recruitment of  
78 anillin and retention of RhoA at the cortex to ensure the transduction of RhoA signaling [13, 21, 22].  
79 Supervillin interacts with a subset of cytokinesis-relevant proteins, including myosin light chain  
80 kinase, PRC1, and EPLIN, potentially promoting myosin activation at the furrow [6, 12, 23, 24].  
81 Recent studies revealed that ezrin interacts with novel cytokinesis-relevant proteins CLIC1/4, and  
82 that ezrin and CLIC1/4 mutually support their localization to the cleavage furrow [25, 26]. In  
83 *Drosophila* cells, a subset of cortically-localized moesin directly interacts with microtubules for  
84 regulating cortical rigidity during pre-anaphase and cytokinesis [27]. Besides the interaction with  
85 cytokinesis-relevant proteins, ezrin also interacts with a Rho-activating factor MYOGEF through  
86 the FERM domain and mediates its recruitment to the membrane blebs, which is required for RhoA  
87 activation at the blebs [28]. Such distinctive protein interactions would give unique roles to these  
88 actin-membrane associated proteins, potentially making them less compatible with each other in  
89 supporting cortical dynamics during cytokinesis.

90

91 Interestingly, however, we previously found that, when we depleted anillin and supervillin, ezrin  
92 was over-accumulated at the cleavage furrow in HeLa cells. In this condition, ERM proteins  
93 became engaged in furrow ingression, whereas they were dispensable for furrow ingression in the  
94 presence of anillin and supervillin [15]. This compensatory over-accumulation of ezrin indicates  
95 semi-compatibility between ezrin and the other actin-membrane associated proteins. However, it  
96 remains unknown which molecular domains of these actin-membrane associated proteins support or  
97 limit their compatibility in cytokinesis control. In this study, by analyzing the localization, dynamics,  
98 and function of ezrin molecular domains, we investigated the mechanism that determines both the  
99 unique and shared roles of ERM proteins in controlling cortical contractile activity during

100 cytokinesis in human cells.

## 101 **Materials and methods**

102

### 103 *Cell culture*

104 HeLa-Kyoto cell lines were cultured in Dulbecco's modified Eagle's medium (DMEM, Wako,  
105 Japan) supplemented with 10% fetal bovine serum (FBS) and 1× antibiotic-antimycotic (Sigma-  
106 Aldrich, St. Louis, MO). For live imaging, cells were cultured in phenol red-free DMEM (Wako)  
107 supplemented with 10% FBS and 1× antibiotic-antimycotic on cover glass-bottom culture dishes  
108 (P35G-1.5-14-C, Mattek, Ashland, MA).

109

### 110 *siRNA, plasmid, and nucleotide transfection*

111 The siRNAs used in this study are 5'-CGAUGCCUCUUUGAAUAAAtt-3' (anillin#1) [13], 5'-  
112 AGCTTACAGACTTAGCATAtt-3' (anillin#2; targeting 3'-UTR sequence), 5'-  
113 GAGAACAAGGGAAUGUUGAGAGAat-3' (supervillin) [15], 5'-  
114 CGUGGGAUGCUCAAAGAUAtt-3' (ezrin) [15], 5'-GGCTGAAACTCAATAAGAAAtt-3'  
115 (moesin) [15], 5'-GGAAGAACGTGTAACCGAAtt-3' (radixin) [15], and 5'-  
116 CGUACGCGGAAUACUUCGAtt-3' (luciferase; DNA is shown in lowercase) [15]. siRNA  
117 transfection was performed using Lipofectamine RNAiMAX (Thermo Fisher Scientific, Waltham,  
118 MA). The plasmid vectors constructed in this study are listed in Table S1. DNA transfection was  
119 performed using JetPEI (Polyplus-transfection, Illkirch, France). HeLa cell lines stably expressing  
120 the GFP-tagged ezrin or anillin mutant genes were obtained by selecting GFP-positive cells in the  
121 presence of 500 µg/mL G418. Anillin-GFP or RFP- $\alpha$ -tubulin stable line has been previously  
122 described [29].

123

### 124 *Cell fixation*

125 For the cell fixation, cells were fixed with 3.2% paraformaldehyde in phosphate-buffered saline  
126 [PBS] for 10 min and permeabilized with 0.5% Triton-X100 in PBS supplemented with 0.1 M  
127 glycine [GPBS] for 10 min at 25°C.

128

129 *Immunoblotting*

130 For immunoblotting, proteins separated by SDS-PAGE were transferred on to Immun-Blot PVDF  
131 membrane (Bio-Rad, Hercules, CA). The blotted membranes were blocked with 0.3% skim milk in  
132 TTBS (50 mM Tris, 138 mM NaCl, 2.7 mM KCl, and 0.1% Tween 20), incubated with the primary  
133 antibodies overnight at 4°C or for 1h at 37°C, and incubated with the secondary antibodies for 30  
134 min at 37°C. Each step was followed by 3 washes with TTBS. For signal detection, the ezWestLumi  
135 plus ECL Substrate (ATTO, Tokyo, Japan) and a LuminoGraph II chemiluminescent imaging  
136 system (ATTO) were used.

137

138 *Antibodies*

139 Mouse anti-GAPDH (sc-32233, Santa Cruz Biotechnology, Dallas, TX; 1:100), mouse anti-GFP  
140 (mFX75, Wako; 1:500), mouse anti- $\beta$ -tubulin (10G10, Wako; 1:1000), rabbit anti-supervillin  
141 (NBP1-90363, Novus Biotechnologicals, Littleton, CO; 1:500), mouse anti-anillin #1 (sc-271814,  
142 Santa Cruz Biotechnology; 1:100), goat anti-anillin #2 (sc-54859, Santa Cruz Biotechnology, Dallas,  
143 TX; 1:100), mouse anti-ezrin (sc-58758, Santa Cruz Biotechnology; 1:100), rabbit anti-radixin  
144 (EP1862Y, GeneTex, Irvine, CA; 1:10000), rabbit anti-moesin (#3150, Cell Signaling Technology,  
145 Danvers, MA; 1:1000), and horseradish peroxidase-conjugated secondary antibodies (Jackson  
146 ImmunoResearch Laboratories, West Grove, PA; 1:1000) were purchased from the suppliers and  
147 used at the dilutions as indicated.

148

149 *Cell imaging*

150 For fixed cell imaging, cells were observed under a TE2000 microscope (Nikon, Japan) equipped  
151 with a  $\times 60$  1.4 NA Plan-Apochromatic, a CSU-X1 confocal unit (Yokogawa, Tokyo, Japan), and an  
152 iXon3 electron multiplier-charge coupled device (EMCCD) camera (Andor, Belfast, United  
153 Kingdom) or ORCA-ER CCD camera (Hamamatsu Photonics, Hamamatsu, Japan), or a Ti-2  
154 microscope (Nikon) equipped with  $\times 60$  1.4 NA Apochromatic, and Zyla4.2 sCMOS camera

155 (Andor). Image acquisition was controlled by  $\mu$ Manager (Open Imaging). For quantification of  
156 fluorescence intensity of EGFP-tagged ezrin mutants at the cleavage furrow and the polar cortex,  
157 dividing cells with their furrow width ranging from 2.5 to 10  $\mu\text{m}$  (Fig. 2E) or 4 to 13  $\mu\text{m}$  (Fig. 3C)  
158 were analyzed. Line profiles were obtained using 10 or 20-pixel wide lines across and along the cell  
159 division axis (for fluorescence measurement at the furrow and the poles, respectively) in Image J  
160 software. Then, fluorescence intensity values at the points corresponding to the cleavage furrow or  
161 the polar cortex in the line profiles were subtracted by background fluorescence intensity outside  
162 the cells and subjected to furrow/pole ratio calculation. The frequency of abnormally large bleb  
163 formation in Fig. 6 was quantified by counting the number of the events taking place during  
164 cytokinesis (defined as the duration from anaphase onset to the time point when furrow width  
165 reached less than 4  $\mu\text{m}$ ) and dividing the event number by the duration of cytokinesis. We defined  
166 the blebs whose maximum area size exceeded 40  $\mu\text{m}^2$  as abnormally large blebs. The frequency of  
167 multinucleated cells was counted using the cell counter plugin in Image J.

168

#### 169 *Fluorescence recovery after photobleaching (FRAP)*

170 We performed FRAP experiments for ezrin-EGFP using an LSM510 microscope (Carl Zeiss, Jena,  
171 Germany) equipped with a C-Apochromat  $\times 40$  1.2 NA W Corr. UV-VIS-IR water immersion  
172 objective (Carl Zeiss). Images were acquired every 1 s. Photobleaching was conducted at 3  $\mu\text{m}$ -  
173 diameter circle region at the cleavage furrow using 488 nm laser (88  $\mu\text{W}$  for 2.08 s) after 2 frames  
174 of pre-bleaching imaging. Dividing cells with their furrow width ranging from 7 to 21  $\mu\text{m}$  (at the  
175 first time frame of pre-bleaching imaging) were analyzed. Normalized fluorescence intensity at the  
176 bleached furrow region was obtained by dividing fluorescence intensity at each time point after  
177 photobleaching by pre-bleaching fluorescence intensity. We measured fluorescence intensity at the  
178 furrow region using round-shaped regions of interest (ROIs) with diameters of 2.1  $\mu\text{m}$  in ImageJ  
179 software. FRAP curves were fitted using a single exponential equation;

180

$$I(t) = I_0 + (I_{max} - I_0)(1 - e^{-kt})$$



181

182 where  $I_0$  or  $I_{max}$  is fluorescence intensity immediately after photobleaching or plateau fluorescence  
183 intensity after recovery, respectively, and  $k$  is fluorescence recovery rate constant. Non-linear curve  
184 fitting was conducted using the solver add-in of Excel software (Microsoft). Half recovery time  $\tau_{1/2}$   
185 is then obtained using equation;

186

$$\tau_{1/2} = \frac{\ln 0.5}{-k}$$

187

### 188 *Statistical analysis*

189 Analyses for significant differences among different samples were conducted using the two-tailed  
190 Student's *t*-test. Statistical significance was set at  $P < 0.05$ .

191

### 192 *Colorimetric cell proliferation assay*

193 For cell viability assay, 4,000 HeLa WT or ezrin-C-term-EGFP-anillin-C-term cells were seeded on  
194 each well of 24-well plates. Immediately after the cell seeding, cells were transfected with siRNA  
195 targeting luciferase (for mock depletion) or anillin 3'-UTR. Then, RNAi treatment was repeated  
196 every 24 h. Ninety-six h after the cell seeding, 5% Cell Counting Kit-8 (Dojindo) was added to the  
197 culture, incubated for 4 h, and absorbance at 450 nm was measured using the Sunrise plate reader  
198 (Tecan). The absorbances of anillin-depleted samples were normalized to those of the corresponding  
199 mock-depleted controls.

200

201

202

203

204 **Results**

205

206 **Compensatory accumulation of ezrin takes place without changing its molecular turnover**  
207 **dynamics**

208 To gain insight into how ezrin over-accumulates at the cleavage furrow upon depleting other actin-  
209 membrane associated proteins [15], we compared molecular turnover dynamics of ezrin-EGFP at  
210 the cleavage furrow in control, supervillin-, or anillin-depleted HeLa cells using FRAP (Fig. 1A-D).  
211 The accumulation of ezrin-EGFP at the furrow increased upon depletion of supervillin or anillin,  
212 which was indicated by the significant increase in the equatorial to polar cortical fluorescence signal  
213 ratio (Fig. 2A, B, E, and 3A-C). We reasoned that if supervillin or anillin influences ezrin  
214 localization through direct modulation of its association with the cleavage furrow, the turnover of  
215 ezrin-EGFP at the furrow would change upon depletion of these proteins. In control cells, FRAP of  
216 ezrin-EGFP at the cleavage furrow took place with an estimated half recovery time of  $29 \pm 1.8$  s  
217 (mean  $\pm$  s.e., n=68 from four independent experiments; Fig. 1B-D). The FRAP profile of ezrin-  
218 EGFP at the cleavage furrow was similar to those previously reported at the cell cortex in interphase  
219 cells [30]. Depletion of supervillin or anillin did not significantly change the turnover of ezrin-  
220 EGFP at the cleavage furrow (an estimated half time recovery of  $32 \pm 2.5$  s or  $30 \pm 2.5$  s,  
221 respectively, n=51 or 75 from four independent experiments, respectively; Fig. 1B-D). These results  
222 suggest that supervillin and anillin are not involved in modulating ezrin dynamics at the furrow.

223

224 **Anillin or supervillin depletion causes over-accumulation of different domains of ezrin at the**  
225 **cleavage furrow**

226 All ERM proteins, anillin, and supervillin can associate with the actin cytoskeleton and membrane  
227 at the cleavage furrow. Therefore, anillin and supervillin may usually suppress ERM proteins'  
228 accumulation through competition for shared binding sites either on the actin cytoskeleton or inner  
229 membrane surface. To test this idea, we investigated the effects of supervillin depletion on the  
230 accumulation of EGFP-tagged membrane-associated FERM domain of ezrin (ezrin-FERM-EGFP)

231 or actin-binding C-terminal half of ezrin (ezrin-C-term-EGFP) at the furrow (Fig. 2A-E). The  
232 depletion of supervillin resulted in increased accumulation of ezrin-C-term-EGFP at the furrow but  
233 did not change that of ezrin-FERM-EGFP (Fig. 2E). We also tested the effect of anillin depletion on  
234 the accumulation of the ezrin truncates (Fig. 3A-C). In contrast to supervillin depletion, anillin  
235 depletion caused an increase in the accumulation of ezrin-FERM-EGFP at the furrow but not ezrin-  
236 C-term-EGFP (Fig. 3C). These results suggest that ezrin differentially shares its binding sites on  
237 membrane or actin cytoskeleton with anillin or supervillin, respectively, at the cleavage furrow.

238

### 239 **Compatibility of actin-binding domains between ezrin and anillin for the induction of furrow** 240 **contraction**

241 The above results indicate that ezrin potentially associates with the membrane-actin cytoskeleton  
242 interface relevant to furrow ingression activity. This prompted us to test whether the FERM domain  
243 and/or C-terminal actin-binding domain of ezrin can support furrowing activity when swapped with  
244 the corresponding original domains of anillin. For this, we constructed chimeric mutant genes  
245 containing the FERM domain with anillin N-terminal actin-/myosin-binding domains (ezrin-FERM-  
246 EGFP-anillin-MABD) or ezrin C-terminal actin-binding domain with anillin C-terminal membrane-  
247 binding domain (ezrin-C-term-EGFP-anillin-C-term; Fig. 4A and S1). The functionality of these  
248 chimeric proteins in furrow ingression was investigated by live imaging in HeLa cells in which  
249 endogenous anillin was depleted using 3'-UTR targeting siRNA (Fig. 4B; immunoblotting shown in  
250 Fig. S1). When transiently expressed in HeLa cells, ezrin-FERM-EGFP-anillin-MABD broadly  
251 distributed at the cellular cortex with weak concentration at the equator during cytokinesis (Fig. 4B).  
252 Ezrin-C-term-EGFP-anillin-C-term strongly accumulated at the cleavage furrow (Fig. 4B). Anillin  
253 depletion severely suppressed furrow ingression with frequent furrow regression, but an exogenous  
254 expression of EGFP-anillin substantially restored normal dynamics of furrow ingression in anillin-  
255 depleted cells (Fig. 4C and D). In contrast, transient expression of EGFP-anillin-MABD, EGFP-  
256 anillin-C-term, ezrin-EGFP, ezrin-FERM-EGFP, ezrin-C-term-EGFP, or ezrin-FERM-EGFP-anillin-  
257 MABD did not restore furrow ingression in anillin-depleted cells. Interestingly, however, the

258 expression of ezrin-C-term-EGFP-anillin-C-term substantially restored furrowing activity in anillin-  
259 depleted cells (Fig. 4B-D). However, the equatorial cortex was frequently deformed with irregular  
260 waviness during furrow ingression in the anillin-depleted cells expressing ezrin-C-term-EGFP-  
261 anillin-C-term (the arrow in Fig. 4B and E), which was much less frequent in EGFP-anillin-  
262 expressing cells. These data demonstrate that the actin-binding domain, but not the membrane-  
263 associated domain of ezrin can substitute for anillin's corresponding domain for furrowing activity.

264

265 The drastic restoration of furrow ingression by ezrin-C-term-EGFP-anillin-C-term in endogenous  
266 anillin-depleted cells prompted us to investigate whether the chimeric gene can support cell  
267 proliferation in the absence of endogenous anillin. For this, we established a HeLa cell line stably  
268 expressing ezrin-C-term-EGFP-anillin-C-term. In WT cells, anillin depletion for 4 d resulted in a  
269 drastic decrease in cell proliferation compared to mock-depleted control in a colorimetric assay,  
270 accompanying drastic multinucleation (Fig. 5A-C). On the other hand, the proliferation of ezrin-C-  
271 term-EGFP-anillin-C-term-expressing cells was not affected by the depletion of endogenous anillin  
272 (Fig. 5B). Consistent with this, ezrin-C-term-EGFP-anillin-C-term substantially suppressed  
273 multinucleation upon anillin depletion (Fig. 5C). Therefore, ezrin-C-term-EGFP-anillin-C-term  
274 could functionally substitute for endogenous anillin in supporting cell viability and proliferation.

275

### 276 **Incompatibility of anillin domains in supporting ezrin's role in cell division**

277 To further understand the exchangeability of the actin-binding or membrane-associated domains  
278 between ezrin and anillin, we tested whether the chimeric proteins substitute for ezrin in regulating  
279 cortical dynamics during cytokinesis. For this, we co-depleted ezrin, moesin, and radixin in HeLa  
280 cells with or without the stable exogenous expression of ezrin mutants and chimeras (Fig. 6A).  
281 During cytokinesis in animal cells, membrane blebs frequently formed at the cell poles, presumably  
282 for pressure release [31]. In mock-depleted control cells, the formation of blebs was immediately  
283 followed by subsequent retraction, limiting the expansion of bleb structures (Fig. 6B, C, and Movie  
284 1). Co-depletion of ERM proteins in WT HeLa cells did not affect furrow ingression but frequently

285 caused abnormally large blebs over  $40 \mu\text{m}^2$  at the cell poles (Fig. 6B, C, and Movie 2). The drastic  
286 increase in bleb size indicates severe defects in the bleb retraction process by depletion of ERM  
287 proteins. Similar disorganization of the polar cortex has been reported in *Drosophila* cells depleted  
288 of moesin, the only ERM protein in that organism [17]. The expression of ezrin-EGFP drastically  
289 suppressed the formation of the abnormally large blebs in ERM-depleted cells (Fig. 6B, C, and  
290 Movie 3). This result suggests that ezrin sufficiently mediates bleb retraction in the absence of  
291 radixin and moesin. Next, we tested the effects of the expression of ezrin-FERM-EGFP-anillin-  
292 MABD or ezrin-C-term-EGFP-anillin-C-term on the blebbing dynamics in ERM-depleted cells.  
293 Though expression levels of these chimeric proteins were relatively low (Fig. S1), both of them  
294 substantially accumulated to cortical blebs (Fig. 6A, B, and Movie 4 and 5). This is consistent with  
295 the fact that both the FERM and anillin-C-term domains have abilities to localize to cortical blebs  
296 [32, 33]. However, both chimera proteins failed to restore the regular blebbing dynamics in ERM-  
297 depleted cells (Fig. 6B and C). These results demonstrate that both the actin- and membrane-  
298 associated domains of anillin are not compatible with the corresponding domains of ezrin in the  
299 process.  
300

301 **Discussion**

302

303 In this study, we investigated the molecular basis of the semi-compatibility between ERM proteins  
304 and other actin-membrane associated proteins in cytokinesis. First, we addressed the mechanism  
305 underlying the compensatory over-accumulation of ezrin upon depletion of other actin-membrane-  
306 associated proteins. Previous studies showed that the drastic changes in the dynamics of cortical  
307 association/dissociation of ERM proteins accompany the control of their localization [30, 34].  
308 However, the FRAP profile of ezrin-EGFP did not change upon compensatory over-accumulation in  
309 supervillin- or anillin-depleted cells, indicating that this process takes place without the active  
310 regulation of ezrin's turnover dynamics at the cortex. Meanwhile, the selective over-accumulation  
311 of ezrin FERM or the C-term at the furrow took place upon depletion of anillin or supervillin,  
312 respectively, indicating that these proteins affect the localization of ezrin through different  
313 mechanisms. A possible interpretation of these results is that ezrin competes for limited binding  
314 sites at the actin cytoskeleton or membrane with supervillin or anillin, respectively. This idea is at  
315 least consistent with the fact that both ezrin and anillin localized to the plasma membrane surface  
316 through their interaction with PIP2 [3, 35-38]. Another possibility is that the absence of anillin or  
317 supervillin may change the actin or membrane scaffolds's states so that ezrin domains can  
318 preferentially associate with them. The extent of the compensatory over-accumulation was much  
319 smaller for the ezrin domain truncates than for full-length ezrin, suggesting that both the FERM and  
320 C-term are required for the maximum association of ezrin to the division site. These results possibly  
321 explain why ERM proteins became engaged in furrowing activity only when both anillin and  
322 supervillin were co-depleted in our previous study [15]; only in this condition, ezrin may get full  
323 access to the binding sites both at actin cytoskeleton and membrane that are responsible for furrow  
324 ingression.

325

326 Ezrin-FERM-EGFP-anillin-MABD could not substitute for endogenous anillin in supporting furrow  
327 ingression. Therefore, despite the possibility that ezrin and anillin share their binding sites at the

328 membrane, their membrane-associated domains are not functionally compatible. In contrast, the  
329 ezrin C-term could sufficiently substitute for anillin MABD in supporting furrow ingression and  
330 long-term cell proliferation. This result demonstrates the potential of ezrin C-term to associate with  
331 the essential fraction of the actin cytoskeleton for cytokinesis progression. It also suggests the  
332 flexibility in the choice of actin-binding moiety for supporting anillin's essential role in cytokinesis,  
333 which is consistent with a previous report [39]. However, the frequent membrane deformation in the  
334 furrow ingression supported by ezrin-C-term-EGFP-anillin-C-term indicates the importance of the  
335 unique properties of anillin MABD [19, 20] in achieving efficient and smooth membrane  
336 invagination at the edge of the cleavage furrow. On the other hand, either anillin-C-term or anillin  
337 MABD could not substitute for the corresponding domain of ezrin in supporting the regular  
338 dynamics of bleb retraction, highlighting poor compatibility between ezrin and anillin in the process.  
339 Extra-long blebs form through sequential generations of secondary blebs, presumably when  
340 tethering of the actin cytoskeleton to the membrane at the blebs is not strong enough to resist inner  
341 cytoplasmic pressure [31]. Therefore, these chimeric proteins may not support the formation of a  
342 rigid actin-membrane tether. Ultrastructural studies have revealed that a relatively isotropic cage-  
343 like 3D network of the actin cytoskeleton filling the entire volume of bleb forms during the bleb  
344 retraction [32, 40]. On the other hand, the actin cytoskeleton with the contractile ring is packed  
345 more tightly, forming an anisotropic purse-string like meshwork during furrow ingression in  
346 different organisms [41-43]. Such polymorphism in actin cytoskeletal ultrastructure in different  
347 cellular processes may set a stringent limit to the functional compatibility among different actin-  
348 binding moieties. Our results shed light on diverse modes of actin-membrane interactions supported  
349 by different actin-membrane associated proteins, enabling complex regulation of cell deformation  
350 during cytokinesis.

351

352 **Figure legends**

353

354 **Fig. 1: Depletion of supervillin does not change the molecular turnover dynamics of ezrin-**  
355 **EGFP at the cleavage furrow in HeLa cells**

356 (A) Immunoblotting of GFP, supervillin, and anillin in RNAi-treated HeLa cells expressing ezrin-  
357 EGFP.  $\beta$ -tubulin was detected as a loading control. (B) Live images of RNAi-treated cells  
358 expressing ezrin-EGFP before and after photobleaching. Photobleached regions at the cleavage  
359 furrow are indicated by open circles in the left panels. Boxed regions at the cleavage furrow are  
360 enlarged in the right panels. Regions of interest (ROIs) used for intensity analysis are indicated by  
361 open circles in the right panels. Photobleaching was conducted at 0 s. (C, D) Quantification of  
362 fluorescence recovery after photobleaching in B (C), and estimated half fluorescence recovery time  
363 (D). Means  $\pm$  standard errors (SE) of normalized fluorescence intensity at the cleavage furrow taken  
364 from at least 51 cells from four independent experiments (live cells) or 10 cells from three  
365 experiments (fixed cells). In live cell analysis, there was no statistically significant difference  
366 between control and the other two samples ( $p = 0.27$  or  $0.64$  for supervillin- or anillin-depleted cells,  
367 respectively, two-tailed  $t$ -test).

368

369 **Fig. 2: Localization of ezrin-FERM-EGFP and ezrin-C-term-EGFP at the cleavage furrow in**  
370 **control and supervillin-depleted HeLa cells**

371 (A, C) Immunoblotting of GFP and supervillin in mock- or supervillin-depleted HeLa cells  
372 expressing EGFP-tagged full-length ezrin (A) or ezrin truncates (C). GAPDH was detected as a  
373 loading control. (B, D) Fluorescent microscopy of EGFP-tagged full-length ezrin (B) or ezrin  
374 truncates (D) in mock- or supervillin-depleted cells. (E) Quantification of cleavage furrow/polar  
375 cortex ratio of fluorescence signals in B and D. Means  $\pm$  SE of at least 11 cells from two  
376 independent experiments for each condition. Asterisk indicates significant difference from control (\*  
377  $p < 0.05$ , \*\*  $p < 0.01$ , two-tailed  $t$ -test).

378



379 **Fig. 3: Localization of ezrin-FERM-EGFP and ezrin-C-term-EGFP at the cleavage furrow in**  
380 **control and anillin-depleted HeLa cells**

381 (A) Immunoblotting of GFP and anillin in mock- or anillin-depleted HeLa cells expressing EGFP-  
382 tagged ezrin full length, FERM, or C-terminal domain.  $\beta$ -tubulin was detected as a loading control.  
383 The arrowheads indicate endogenous anillin and the asterisk indicates nonspecific bands. (B)  
384 Fluorescent microscopy of EGFP-tagged ezrin mutants in mock-, or anillin-depleted cells. (C)  
385 Quantification of cleavage furrow/polar cortex ratio of fluorescence signals in B. Means  $\pm$  SE of at  
386 least 12 cells from two independent experiments for each condition. Asterisk indicates significant  
387 difference from control (\*\*  $p < 0.01$ , two-tailed  $t$ -test).

388

389 **Fig. 4: Ezrin C-terminal domain can substitute for anillin actin- and myosin-binding domains**  
390 **for supporting furrow ingression**

391 (A) Schematic structure of truncated or chimera genes used in the experiments. (B) Live imaging of  
392 HeLa cells expressing EGFP-tagged ezrin or anillin mutants with RFP- $\alpha$ -tubulin. Anaphase onset  
393 was set as 0 min. The arrow indicates irregular waviness of the equatorial cortex. (C, D) Time  
394 courses of cleavage furrow widths (C) and maximum furrowing rate (D) in live-cell imaging in B.  
395 Mean  $\pm$  SE of at least 10 cells from at least two independent experiments for each condition (\*  $p <$   
396 0.05, \*\*  $p < 0.01$ , two-tailed  $t$ -test). (E) The frequency of cells containing the cleavage furrow with  
397 irregular waviness. Time frames of live images of anillin-depleted cells expressing EGFP-anillin or  
398 ezrin-C-term-EGFP-anillin-C-term, at which their furrow widths just reached  $< 10 \mu\text{m}$ , were  
399 selected for the analysis. At least 14 cells pooled from three independent experiments were analyzed.

400

401 **Fig. 5: Ezrin C-terminal domain can substitute for anillin actin- and myosin-binding domains**  
402 **for supporting cell proliferation**

403 (A) Immunoblotting of anillin in mock- or anillin-depleted WT and ezrin-C-term-EGFP-anillin-C-  
404 term HeLa cells.  $\beta$ -tubulin was detected as a loading control. The asterisk indicates a cross-reaction  
405 of anillin antibody to the chimeric protein. (B) Colorimetric cell proliferation assay in mock- or

406 anillin-depleted WT and ezrin-C-term-EGFP-anillin-C-term HeLa cells. Absorbance in anillin-  
407 depleted samples was normalized to that of corresponding mock-depleted controls. Mean  $\pm$  SE of 6  
408 samples from 3 independent experiments. (C) Frequency of multinucleation in B. Mean  $\pm$  SE of  
409 three independent experiments. At least 258 cells were analysed for each condition. (\*\*  $p < 0.01$ ,  
410 two-tailed  $t$ -test).

411

412 **Fig. 6: Effects of the expression of the chimeric proteins on polar cortical blebbing in ERM-**  
413 **depleted cells**

414 (A) Immunoblotting of ERM proteins and GFP in mock- or ERM-depleted cells expressing EGFP-  
415 tagged exogenous genes.  $\beta$ -tubulin was detected as a loading control. (B) Live images of mock- or  
416 ERM-depleted HeLa cells expressing ezrin-EGFP or chimeric proteins in cytokinesis. The arrows  
417 indicate abnormally large blebs. Polar blebs are 3 $\times$  enlarged in the bottom panels. Transmitted light  
418 (TL) and fluorescence (EGFP) microscopies are shown. (C) The frequency of abnormally large bleb  
419 formation. Mean  $\pm$  SE of at least 16 cells from at least four independent experiments (\*\*  $p < 0.01$ ,  
420 two-tailed  $t$ -test).

421

422 **Fig. S1: Immunoblotting of the cells expressing EGFP-tagged exogenous genes**

423 Immunoblotting of GFP and anillin in the cells expressing EGFP-tagged exogenous genes. Anillin  
424 was detected with two different antibodies to confirm depletion of endogenous anillin in the cells  
425 expressing different chimeric proteins. The arrowheads indicate endogenous anillin and the asterisk  
426 indicates nonspecific bands.  $\beta$ -tubulin was detected as a loading control.

427

428 **Fig. S2: Expression level of EGFP-tagged proteins**

429 The whole-cell fluorescence intensity of EGFP-tagged proteins in the cells analysed in Fig. 6C.  
430 Mean fluorescence intensity in the whole cell area was subtracted by background fluorescence  
431 intensity outside the cells. Mean  $\pm$  SE of at least 16 cells from at least four independent experiments.

432

433 **Movie 1: A mock-depleted WT HeLa cell undergoing cytokinesis**

434 Left: A transmitted light (TL) microscopy. Right: A fluorescent microscopy (GFP channel). Movie  
435 is shown at 300× real time. Field of view is 50 μm × 40 μm for each channel.

436

437 **Movie 2: An ERM-depleted WT HeLa cell undergoing cytokinesis**

438 Left: A TL microscopy. Right: A fluorescent microscopy (GFP channel). Movie is shown at 300×  
439 real time. Field of view is 70 μm × 50 μm for each channel.

440

441 **Movie 3: An ERM-depleted ezrin-EGFP HeLa cell undergoing cytokinesis**

442 Left: A TL microscopy. Right: A fluorescent microscopy (GFP channel). Movie is shown at 300×  
443 real time. Field of view is 60 μm × 50 μm for each channel.

444

445 **Movie 4: An ERM-depleted ezrin-FERM-EGFP-anillin-MABD HeLa cell undergoing**  
446 **cytokinesis**

447 Left: A TL microscopy. Right: A fluorescent microscopy (GFP channel). Movie is shown at 300×  
448 real time. Field of view is 60 μm × 60 μm for each channel.

449

450 **Movie 5: An ERM-depleted ezrin-C-term-EGFP-anillin-C-term HeLa cell undergoing**  
451 **cytokinesis**

452 Left: A TL microscopy. Right: A fluorescent microscopy (GFP channel). Movie is shown at 300×  
453 real time. Field of view is 80 μm × 50 μm for each channel.

454

455

456

457 **Acknowledgement**

458 We thank Sarada Bulchand for commenting on the draft, the Open Facility, Global Facility Center,  
459 Creative Research Institution, Hokkaido University for allowing us to use their instrument. This  
460 work was supported by the Nomura Gakugei Foundation and the Sasakawa Scientific Research  
461 Grant from The Japan Science Society to S.H., Grants-in-Aid for Scientific Research C (18K06201)  
462 to A.K., Grant-in-Aid for Scientific Research on Innovative Areas “Information physics of living  
463 matters” (20H05522) to M.K., DBT/Wellcome Trust India Alliance (India Alliance;  
464 IA/I/14/1/501317) to M.M., Grants-in-Aid for Scientific Research B (19H03219), on Innovative  
465 Areas “Singularity Biology (No.8007)” (19H05413), Fostering Joint International Research B  
466 (19KK0181), and JSPS Bilateral Joint Research Project (JPJSBP120193801) of MEXT, the  
467 Princess Takamatsu Cancer Research Fund, the Kato Memorial Bioscience Foundation, the Orange  
468 Foundation, the Smoking Research Foundation, the Suhara Memorial Foundation, and the Nakatani  
469 Foundation to R.U.

470

471 **Author Contributions**

472 Conceptualization, G.Y., S.H., and R.U.; Methodology, A.K., M.K., M.M., and R.U.; Investigation,  
473 G.Y., S.H., and R.U.; Formal Analysis, G.Y., S.H., and R.U.; Resources, A.K., M.K., M.M., and  
474 R.U.; Writing – Original Draft, R.U.; Writing – Review & Editing, G.Y., S.H., A.K., M.M., and  
475 R.U.; Funding Acquisition, S.H., A.K., M.K., M.M., and R.U.

476

477

478 **References**

479

480

- 481 [1] C.M. Field, B.M. Alberts, Anillin, a contractile ring protein that cycles from the nucleus to the  
482 cell cortex, *The Journal of Cell Biology* 131 (1995) 165-178.
- 483 [2] A.F. Straight, C.M. Field, T.J. Mitchison, Anillin binds nonmuscle myosin II and regulates the  
484 contractile ring, *Mol Biol Cell* 16 (2005) 193-201.
- 485 [3] J. Liu, Gregory D. Fairn, Derek F. Ceccarelli, F. Sicheri, A. Wilde, Cleavage Furrow  
486 Organization Requires PIP2-Mediated Recruitment of Anillin, *Current Biology* 22 (2012) 64-69.
- 487 [4] K.N. Pestonjamas, R.K. Pope, J.D. Wulfkühle, E.J. Luna, Supervillin (p205): A Novel  
488 Membrane-associated, F-Actin-binding Protein in the Villin/Gelsolin Superfamily, *The Journal*  
489 *of Cell Biology* 139 (1997) 1255-1269.
- 490 [5] Y. Chen, N. Takizawa, J.L. Crowley, S.W. Oh, C.L. Gatto, T. Kambara, O. Sato, X.-d. Li, M. Ikebe,  
491 E.J. Luna, F-actin and Myosin II Binding Domains in Supervillin, *Journal of Biological*  
492 *Chemistry* 278 (2003) 46094-46106.
- 493 [6] T.C. Smith, Z. Fang, E.J. Luna, Novel interactors and a role for supervillin in early cytokinesis,  
494 *Cytoskeleton (Hoboken)* 67 (2010) 346-364.
- 495 [7] M. Algrain, O. Turunen, A. Vaheri, D. Louvard, M. Arpin, Ezrin contains cytoskeleton and  
496 membrane binding domains accounting for its proposed role as a membrane-cytoskeletal linker,  
497 *The Journal of Cell Biology* 120 (1993) 129-139.
- 498 [8] S. Tsukita, S. Yonemura, S. Tsukita, ERM proteins: head-to-tail regulation of actin-plasma  
499 membrane interaction, *Trends in Biochemical Sciences* 22 (1997) 53-58.
- 500 [9] S. Tsukita, S. Yonemura, Cortical actin organization: lessons from ERM (ezrin/radixin/moesin)  
501 proteins, *The Journal of biological chemistry* 274 (1999) 34507-34510.
- 502 [10] N. Sato, S. Yonemura, T. Obinata, S. Tsukita, S. Tsukita, Radixin, a barbed end-capping actin-  
503 modulating protein, is concentrated at the cleavage furrow during cytokinesis, *The Journal of*  
504 *Cell Biology* 113 (1991) 321-330.
- 505 [11] K. Oegema, M.S. Savoian, T.J. Mitchison, C.M. Field, Functional analysis of a human  
506 homologue of the *Drosophila* actin binding protein anillin suggests a role in cytokinesis, *The*  
507 *Journal of cell biology* 150 (2000) 539-552.
- 508 [12] T.C. Smith, P.C. Fridy, Y. Li, S. Basil, S. Arjun, R.M. Friesen, J. Leszyk, B.T. Chait, M.P. Rout,  
509 E.J. Luna, Supervillin binding to myosin II and synergism with anillin are required for  
510 cytokinesis, *Molecular Biology of the Cell* 24 (2013) 3603-3619.
- 511 [13] A.J. Piekny, M. Glotzer, Anillin is a scaffold protein that links RhoA, actin, and myosin during  
512 cytokinesis, *Current biology : CB* 18 (2008) 30-36.
- 513 [14] P. Kunda, A.E. Pelling, T. Liu, B. Baum, Moesin Controls Cortical Rigidity, Cell Rounding, and  
514 Spindle Morphogenesis during Mitosis, *Current Biology* 18 (2008) 91-101.
- 515 [15] S. Hiruma, T. Kamasaki, K. Otomo, T. Nemoto, R. Uehara, Dynamics and function of ERM  
516 proteins during cytokinesis in human cells, *FEBS letters* 591 (2017) 3296-3309.
- 517 [16] S. Carreno, I. Kouranti, E.S. Glusman, M.T. Fuller, A. Echard, F. Payre, Moesin and its

- 518           activating kinase Slik are required for cortical stability and microtubule organization in mitotic  
519           cells, *The Journal of Cell Biology* 180 (2008) 739-746.
- 520 [17] C. Roubinet, B. Decelle, G. Chicanne, J.F. Dorn, B. Payrastrre, F. Payre, S. Carreno, Molecular  
521           networks linked by Moesin drive remodeling of the cell cortex during mitosis, *The Journal of*  
522           *Cell Biology* 195 (2011) 99-112.
- 523 [18] P. Kunda, N.T. Rodrigues, E. Moendarbary, T. Liu, A. Ivetic, G. Charras, B. Baum, PP1-  
524           mediated moesin dephosphorylation couples polar relaxation to mitotic exit, *Current biology* :  
525           CB 22 (2012) 231-236.
- 526 [19] K. Matsuda, M. Sugawa, M. Yamagishi, N. Kodera, J. Yajima, Visualizing dynamic actin cross-  
527           linking processes driven by the actin-binding protein anillin, *FEBS letters* (2019).
- 528 [20] S. Jananji, C. Risi, I.K.S. Lindamulage, L.P. Picard, R. Van Sciver, G. Laflamme, A. Albaghmati,  
529           G.R.X. Hickson, B.H. Kwok, V.E. Galkin, Multimodal and Polymorphic Interactions between  
530           Anillin and Actin: Their Implications for Cytokinesis, *Journal of molecular biology* 429 (2017)  
531           715-731.
- 532 [21] S. Budnar, K.B. Husain, G.A. Gomez, M. Naghibosadat, A. Varma, S. Verma, N.A. Hamilton,  
533           R.G. Morris, A.S. Yap, Anillin Promotes Cell Contractility by Cyclic Resetting of RhoA Residence  
534           Kinetics, *Dev Cell* 49 (2019) 894-906.e812.
- 535 [22] D. Beaudet, N. Pham, N. Skaik, A. Piekny, Importin binding mediates the intramolecular  
536           regulation of anillin during cytokinesis, *Mol Biol Cell* 31 (2020) 1124-1139.
- 537 [23] H. Hasegawa, T. Hyodo, E. Asano, S. Ito, M. Maeda, H. Kuribayashi, A. Natsume, T.  
538           Wakabayashi, M. Hamaguchi, T. Senga, The role of PLK1-phosphorylated SVIL in myosin II  
539           activation and cytokinetic furrowing, *Journal of Cell Science* 126 (2013) 3627-3637.
- 540 [24] N. Takizawa, R. Ikebe, M. Ikebe, E.J. Luna, Supervillin slows cell spreading by facilitating  
541           myosin II activation at the cell periphery, *J Cell Sci* 120 (2007) 3792-3803.
- 542 [25] E. Peterman, M. Valius, R. Prekeris, CLIC4 is a cytokinetic cleavage furrow protein that  
543           regulates cortical cytoskeleton stability during cell division, *J Cell Sci* 133 (2020).
- 544 [26] Z.C. Uretmen Kagiali, N. Saner, M. Akdag, E. Sanal, B.S. Degirmenci, G. Mollaoglu, N. Ozlu,  
545           CLIC4 and CLIC1 bridge plasma membrane and cortical actin network for a successful  
546           cytokinesis, *Life science alliance* 3 (2020).
- 547 [27] S. Solinet, K. Mahmud, S.F. Stewman, K. Ben El Kadhi, B. Decelle, L. Talje, A. Ma, B.H. Kwok,  
548           S. Carreno, The actin-binding ERM protein Moesin binds to and stabilizes microtubules at the  
549           cell cortex, *The Journal of cell biology* 202 (2013) 251-260.
- 550 [28] M. Jiao, D. Wu, Q. Wei, Myosin II-interacting guanine nucleotide exchange factor promotes bleb  
551           retraction via stimulating cortex reassembly at the bleb membrane, *Mol Biol Cell* 29 (2018) 643-  
552           656.
- 553 [29] R. Uehara, Y. Tsukada, T. Kamasaki, I. Poser, K. Yoda, D.W. Gerlich, G. Goshima, Aurora B and  
554           Kif2A control microtubule length for assembly of a functional central spindle during anaphase,  
555           *The Journal of cell biology* 202 (2013) 623-636.
- 556 [30] M. Fritzsche, R. Thorogate, G. Charras, Quantitative analysis of ezrin turnover dynamics in the  
557           actin cortex, *Biophysical journal* 106 (2014) 343-353.

- 558 [31] G.T. Charras, A short history of blebbing, *J Microsc* 231 (2008) 466-478.
- 559 [32] G.T. Charras, C.K. Hu, M. Coughlin, T.J. Mitchison, Reassembly of contractile actin cortex in  
560 cell blebs, *The Journal of cell biology* 175 (2006) 477-490.
- 561 [33] K. Aoki, F. Maeda, T. Nagasako, Y. Mochizuki, S. Uchida, J. Ikenouchi, A RhoA and Rnd3 cycle  
562 regulates actin reassembly during membrane blebbing, *Proceedings of the National Academy of*  
563 *Sciences* 113 (2016) E1863-E1871.
- 564 [34] S. Coscoy, F. Waharte, A. Gautreau, M. Martin, D. Louvard, P. Mangeat, M. Arpin, F. Amblard,  
565 Molecular analysis of microscopic ezrin dynamics by two-photon FRAP, *Proceedings of the*  
566 *National Academy of Sciences* 99 (2002) 12813-12818.
- 567 [35] M. Hirao, N. Sato, T. Kondo, S. Yonemura, M. Monden, T. Sasaki, Y. Takai, S. Tsukita, S.  
568 Tsukita, Regulation mechanism of ERM (ezrin/radixin/moesin) protein/plasma membrane  
569 association: possible involvement of phosphatidylinositol turnover and Rho-dependent signaling  
570 pathway, *The Journal of cell biology* 135 (1996) 37-51.
- 571 [36] T. Matsui, S. Yonemura, S. Tsukita, S. Tsukita, Activation of ERM proteins in vivo by Rho  
572 involves phosphatidylinositol 4-phosphate 5-kinase and not ROCK kinases, *Current biology* :  
573 *CB* 9 (1999) 1259-1262.
- 574 [37] S. Yonemura, T. Matsui, S. Tsukita, S. Tsukita, Rho-dependent and -independent activation  
575 mechanisms of ezrin/radixin/moesin proteins: an essential role for polyphosphoinositides in vivo,  
576 *J Cell Sci* 115 (2002) 2569-2580.
- 577 [38] B.T. Fievet, A. Gautreau, C. Roy, L. Del Maestro, P. Mangeat, D. Louvard, M. Arpin,  
578 Phosphoinositide binding and phosphorylation act sequentially in the activation mechanism of  
579 ezrin, *The Journal of cell biology* 164 (2004) 653-659.
- 580 [39] L. Sun, R. Guan, I.J. Lee, Y. Liu, M. Chen, J. Wang, J.Q. Wu, Z. Chen, Mechanistic insights into  
581 the anchorage of the contractile ring by anillin and Mid1, *Dev Cell* 33 (2015) 413-426.
- 582 [40] A.S. Chikina, T.M. Svitkina, A.Y. Alexandrova, Time-resolved ultrastructure of the cortical actin  
583 cytoskeleton in dynamic membrane blebs, *The Journal of cell biology* 218 (2019) 445-454.
- 584 [41] T. Kamasaki, M. Osumi, I. Mabuchi, Three-dimensional arrangement of F-actin in the  
585 contractile ring of fission yeast, *The Journal of cell biology* 178 (2007) 765-771.
- 586 [42] J.H. Henson, C.E. Ditzler, A. Germain, P.M. Irwin, E.T. Vogt, S. Yang, X. Wu, C.B. Shuster, The  
587 ultrastructural organization of actin and myosin II filaments in the contractile ring: new  
588 support for an old model of cytokinesis, *Mol Biol Cell* 28 (2017) 613-623.
- 589 [43] F. Spira, S. Cuylen-Haering, S. Mehta, M. Samwer, A. Reversat, A. Verma, R. Oldenbourg, M.  
590 Sixt, D.W. Gerlich, Cytokinesis in vertebrate cells initiates by contraction of an equatorial  
591 actomyosin network composed of randomly oriented filaments, *eLife* 6 (2017).
- 592

# Figure 1

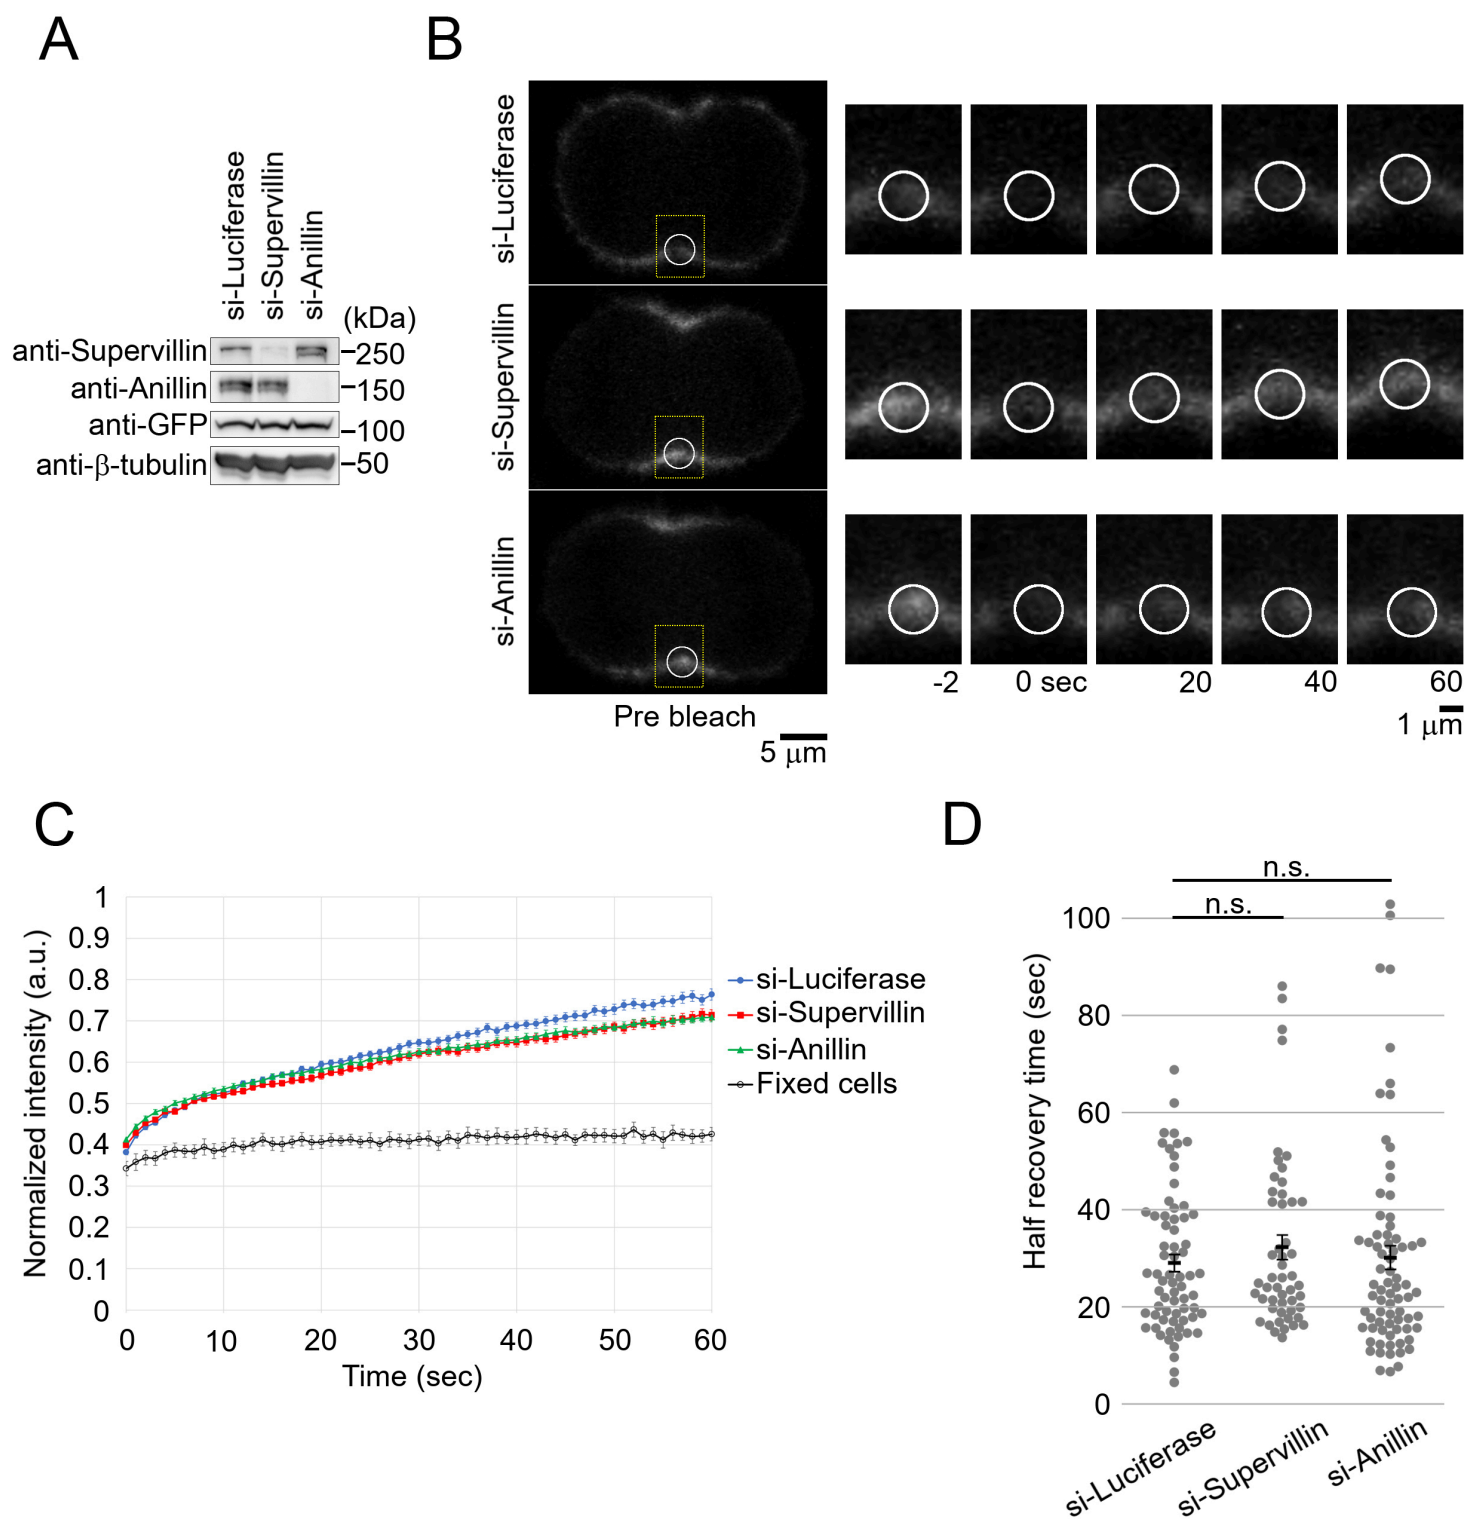



## Figure 2

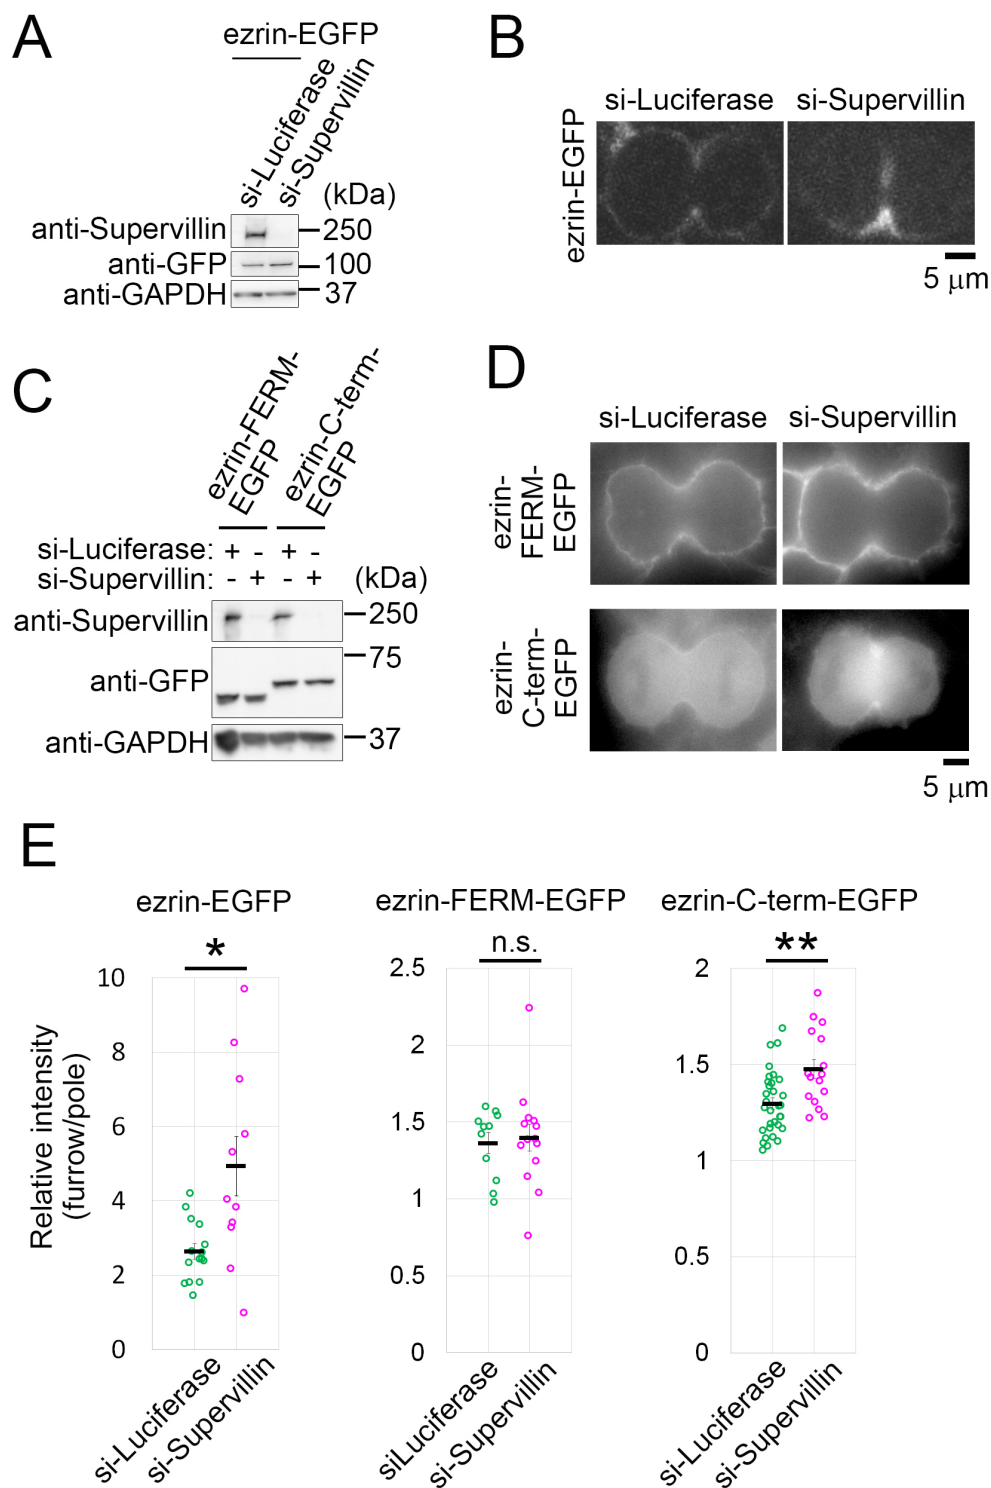

# Figure 3

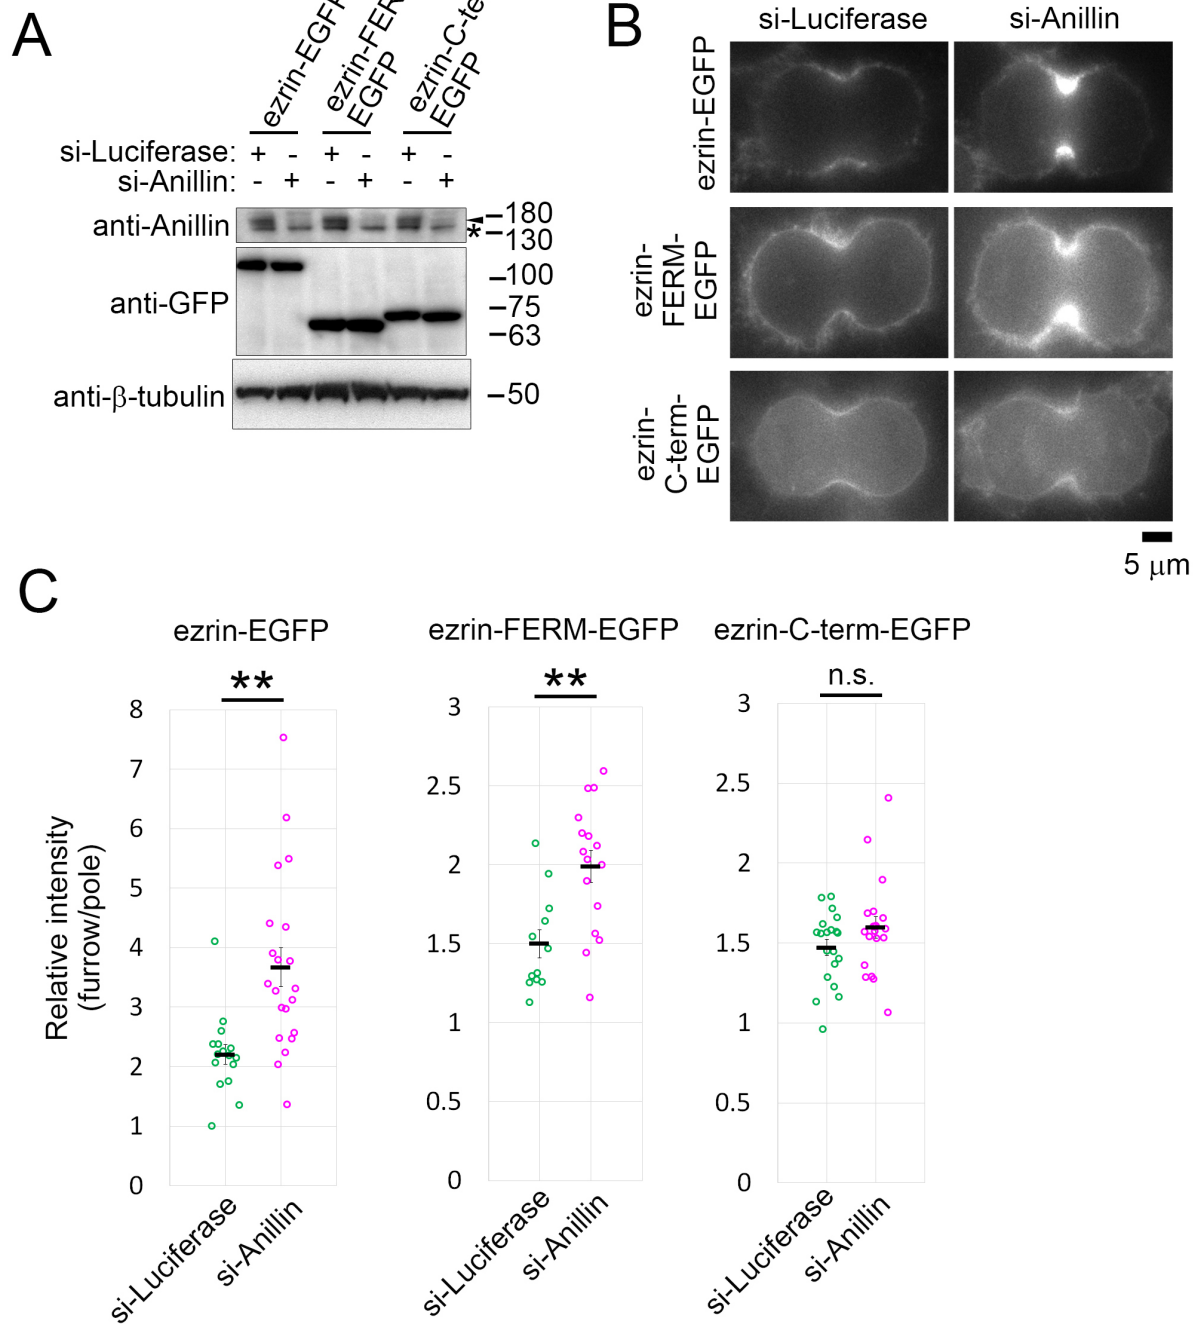

# Figure 4

## A

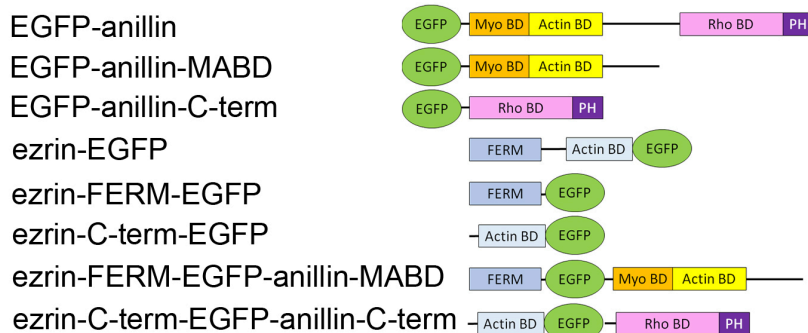

## B

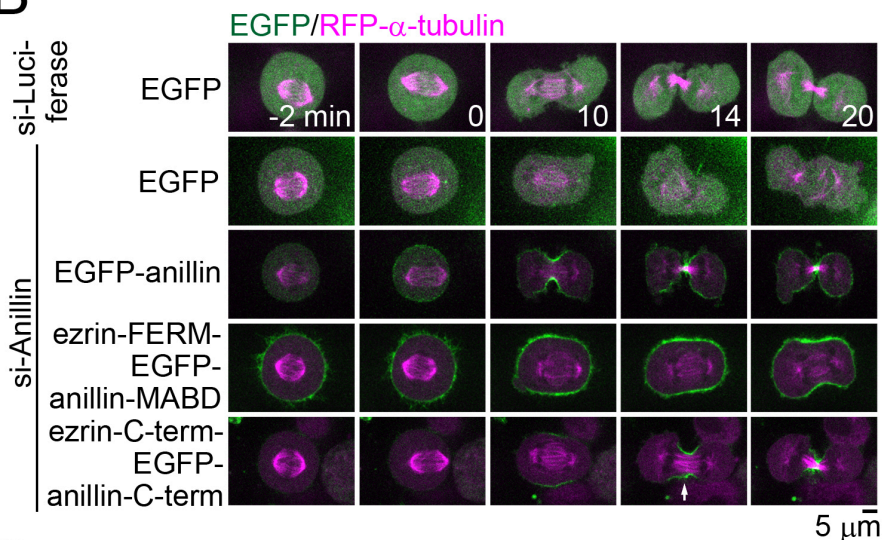

## C

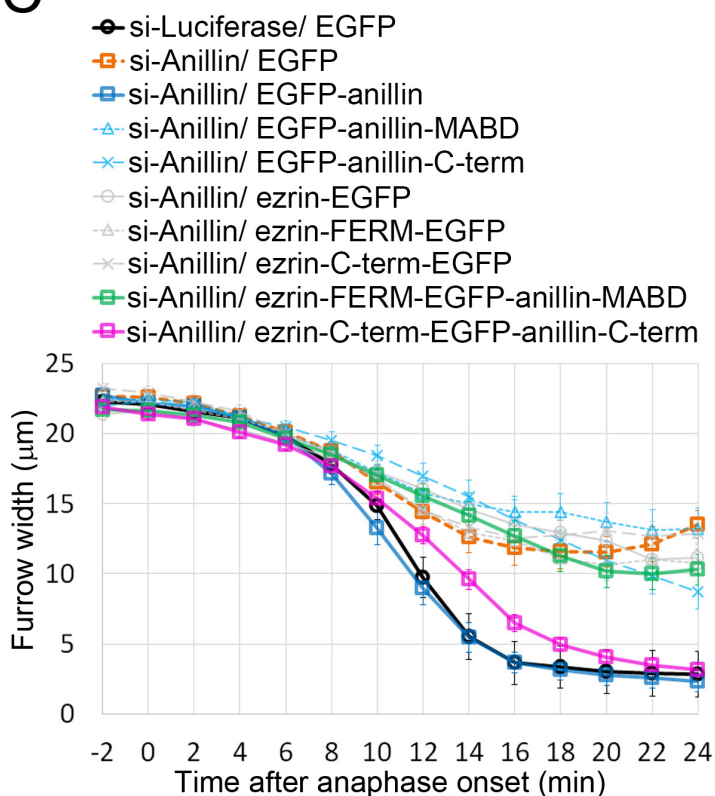

## E

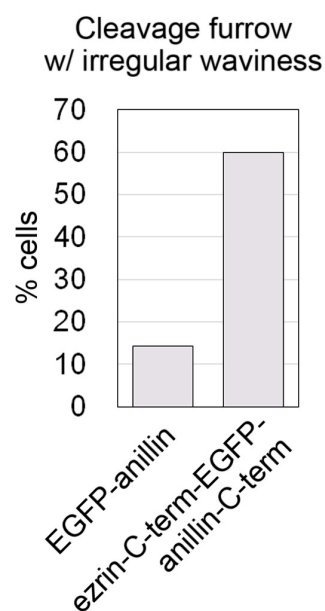

## D

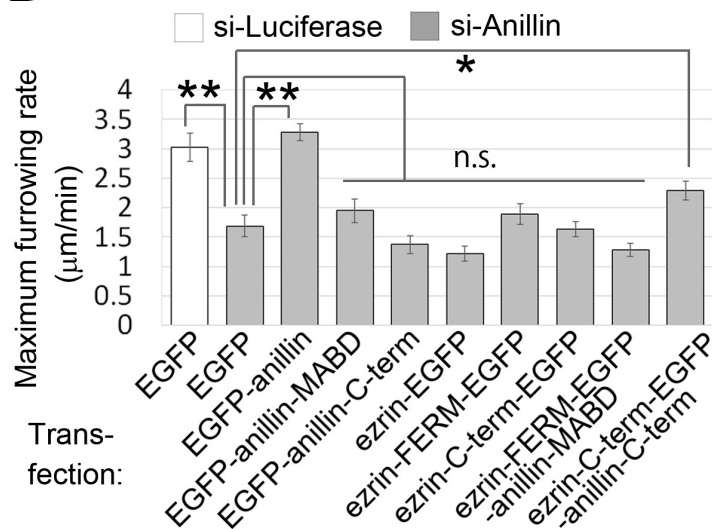

## Figure 5

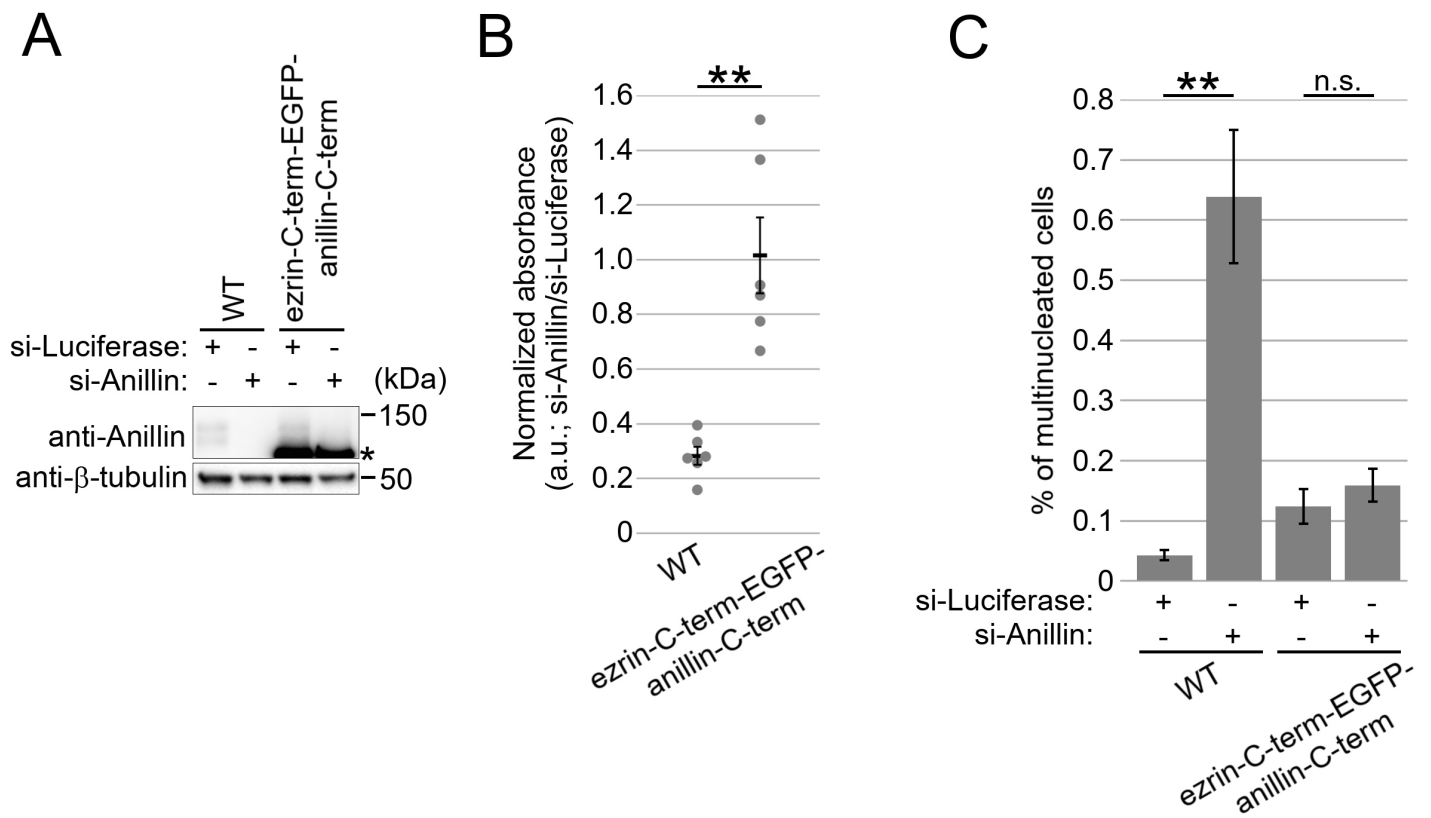

A

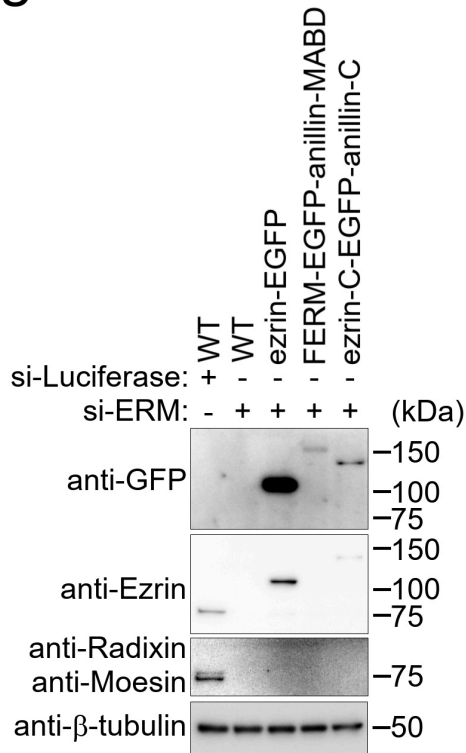

C

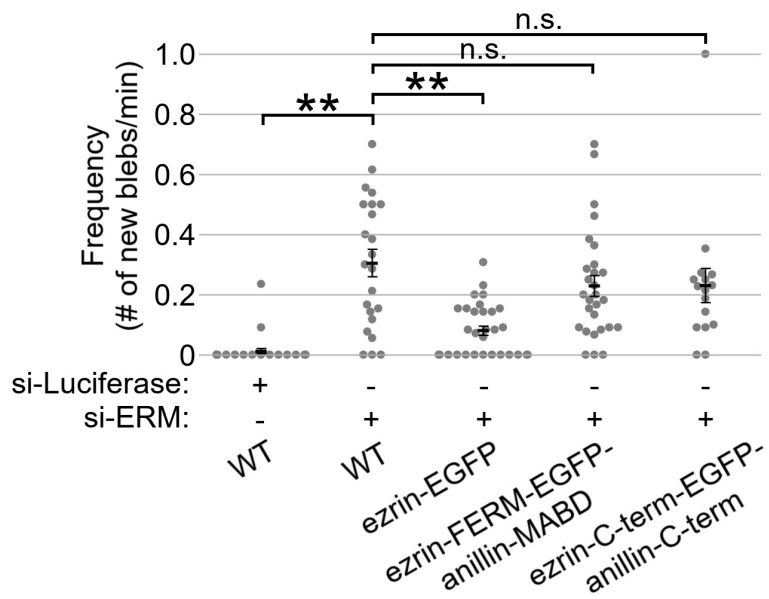

B

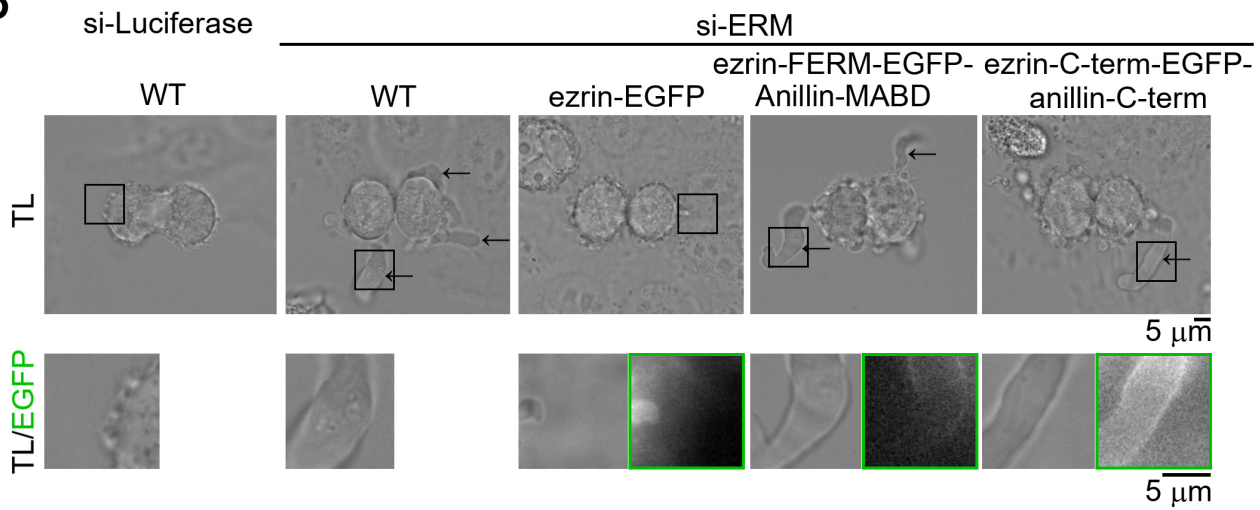

# Figure S1

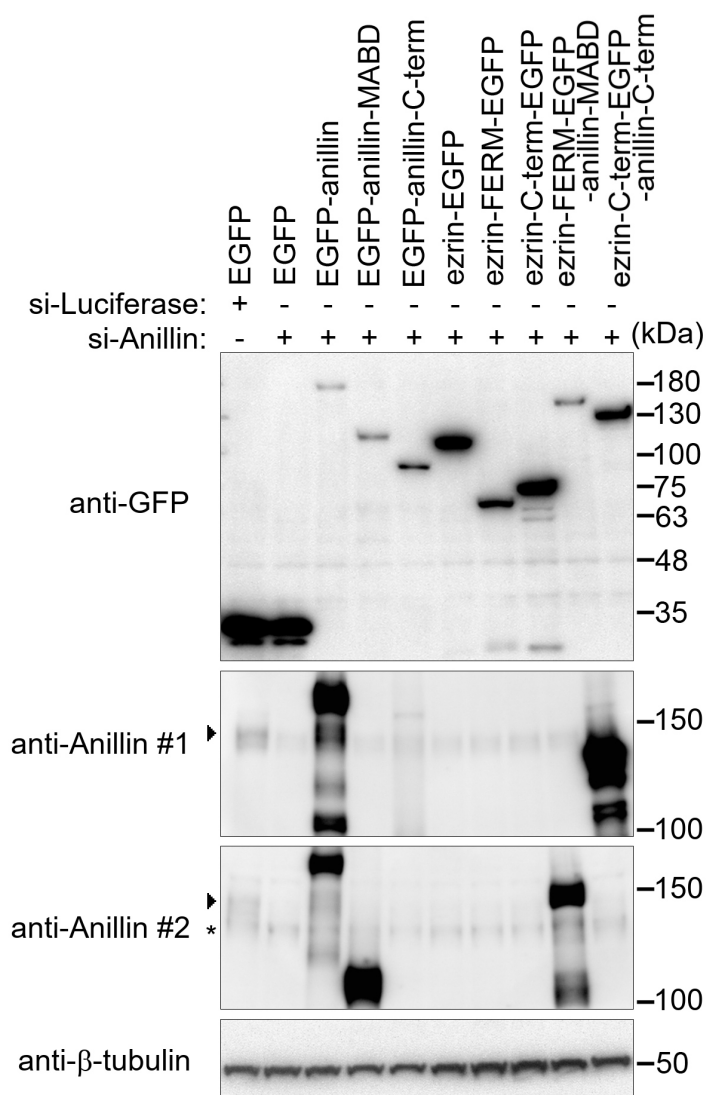

## Figure S2

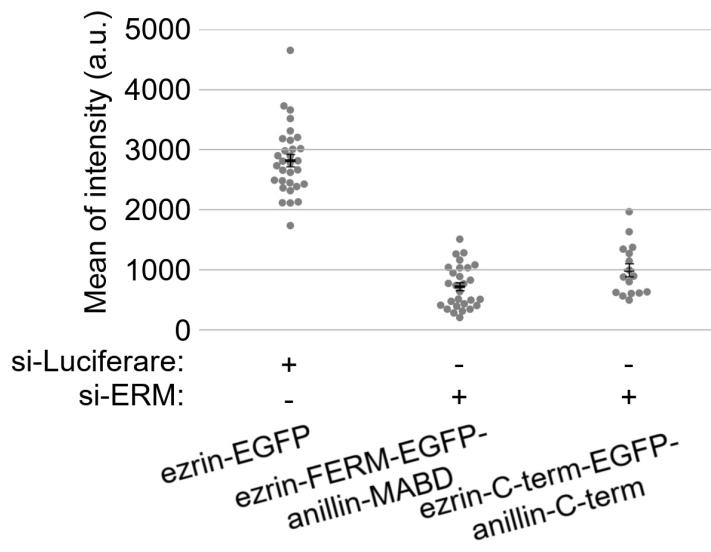

Source: https://biorxiv.org/content/10.1101/2020.11.30.403253v1.full.pdf
